# Supplementary material for: Effects of hydrogen bonds on the single-chain mechanics of chitin
Source: Royal Society of Chemistry journal article supplement (doi:10.1039/d2cp02907c), 2022-01-01
Supplement: d2cp02907c1.pdf [file d2cp02907c1.pdf]

## Supporting Information

# Effects of Hydrogen Bonds on the Single-Chain Mechanics of Chitin

**Lu Qian<sup>b</sup>, Xin Guo<sup>a</sup>, Kai Zhang<sup>a</sup>, Miao Yu<sup>a,\*</sup>**

<sup>a</sup> School of Mechanical Engineering, Sichuan University, Chengdu 610065, China;

<sup>b</sup> School of Materials Science and Engineering, South China University of Technology, Guangzhou 510641, China;  
qianlu@scut.edu.cn (L.Q.)

\* Correspondence: miaoyu@scu.edu.cn; Tel.: +86-28-85405307

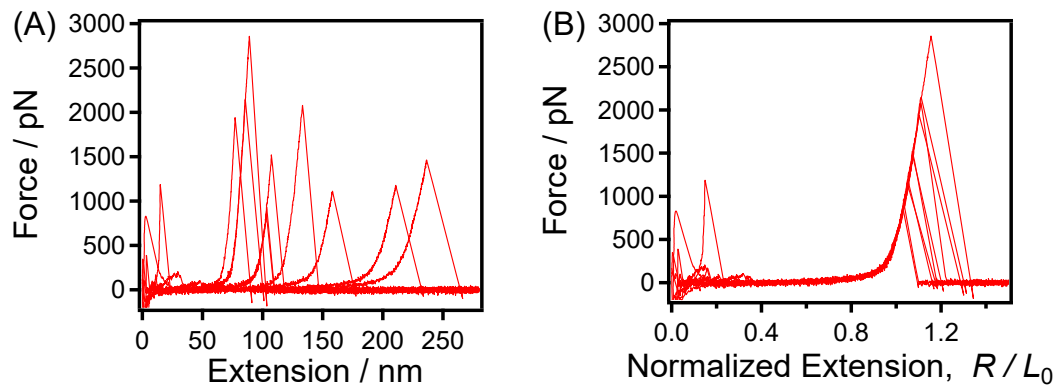

**Fig. S1** (A) Ten F-E curves of chitin obtained in nonane. (B) Normalized F-E curves of chitin obtained in nonane (the force for normalization is 1000 pN).

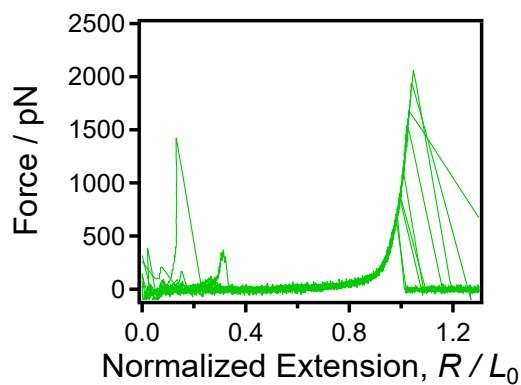

**Fig. S2** Normalized F-E curves of chitin obtained in DMSO (the force for normalization is 1000 pN).

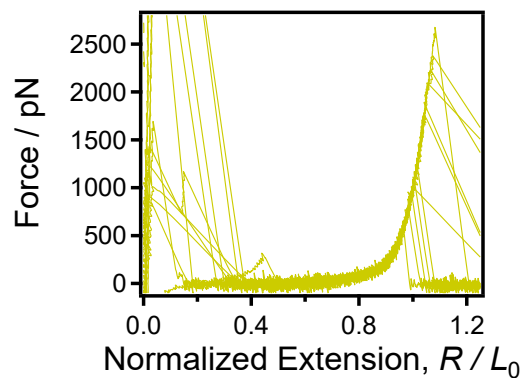

**Fig. S3** Normalized F-E curves of cellulose obtained in nonane (the force for normalization is 1000 pN).

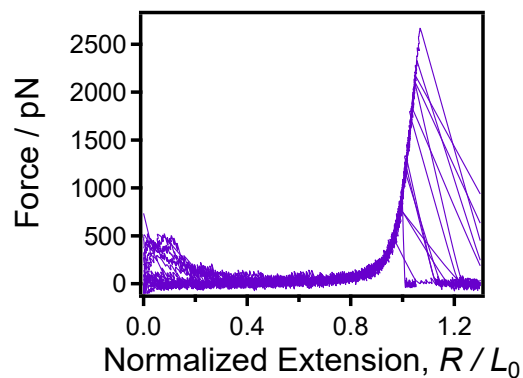

**Fig. S4** Normalized F-E curves of cellulose obtained in DMSO (the force for normalization is 1000 pN).

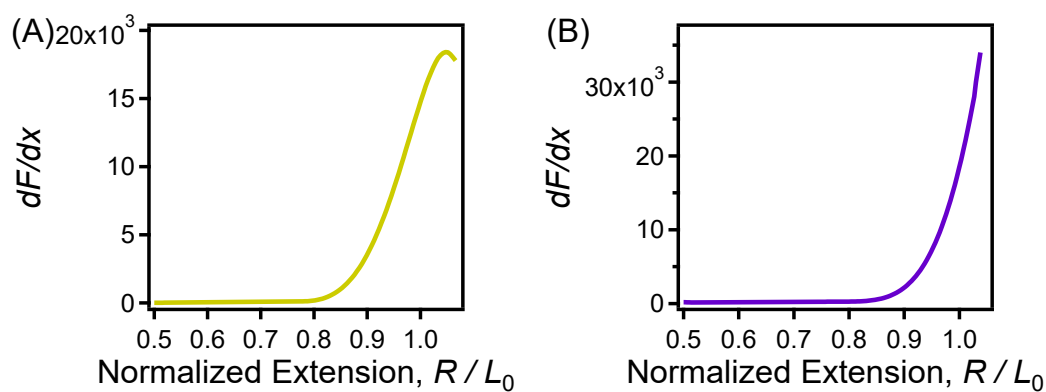

**Fig. S5** (A) The  $dF/dx$  of the polynomial fitting curve that shown in Fig. 4A (the F-E curves of chitin and cellulose obtained in nonane). (B) The  $dF/dx$  of the polynomial fitting curve that shown in Fig. 4B (the F-E curves of chitin and cellulose obtained in DMSO).

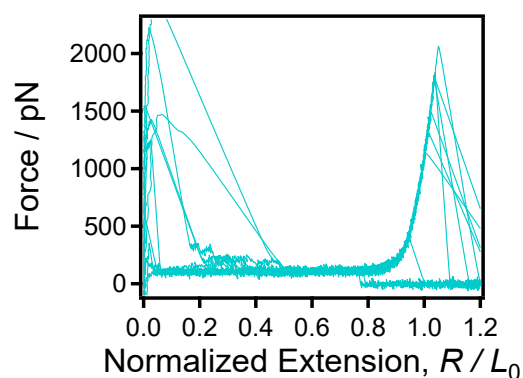

**Fig. S6** Normalized F-E curves of cellulose obtained in water (the force for normalization is 1000 pN).

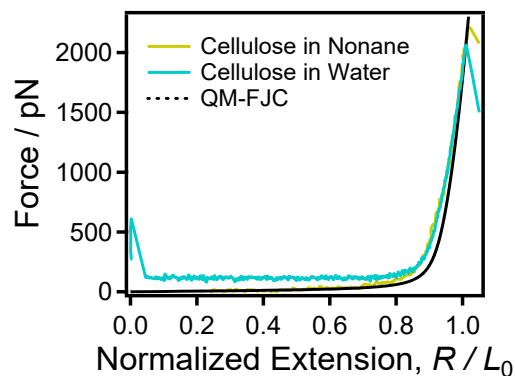

**Fig. S7** Comparison of renormalized (at 2000 pN) F-E curves of cellulose obtained in nonane (yellow solid line), water (bright blue solid line) and the QM-FJC model (black dashed line).

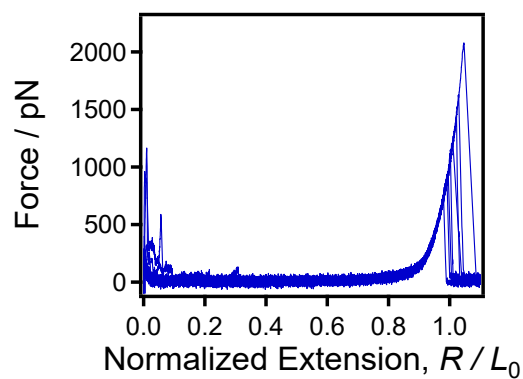

**Fig. S8** Normalized F-E curves of chitin obtained in water (the force for normalization is 1000 pN).

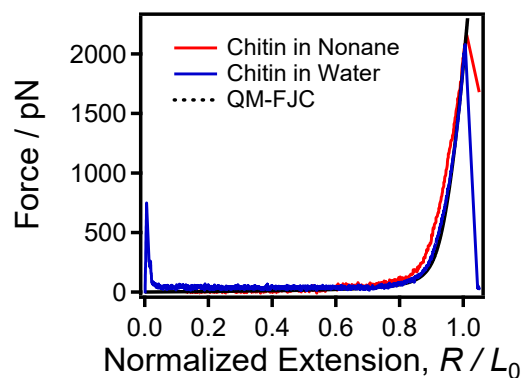

**Fig. S9** Comparison of renormalized (at 2000 pN) F-E curves of chitin obtained in nonane (red solid line), water (blue solid line) and the QM-FJC model (black dashed line).

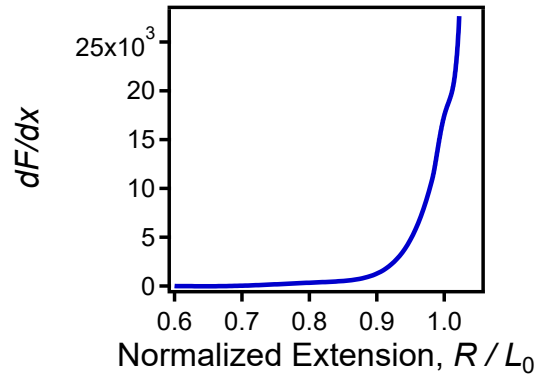

**Fig. S10** The  $dF/dx$  of the polynomial fitting curve that the F-E curve of chitin obtained in water.

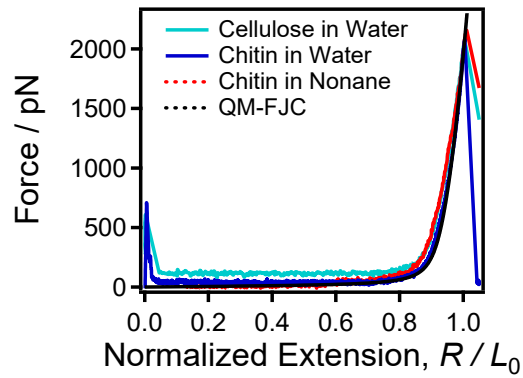

**Fig. S11** Comparison of renormalized (at 2000 pN) F-E curves of chitin obtained in nonane (red solid line), water (blue solid line) and the QM-FJC model (black dashed line).
